# Supplementary material for: An Assessment of Mass Flows, Removal and Environmental Emissions of Bisphenols in a Sequencing Batch Reactor Wastewater Treatment Plant
Source: MDPI journal article supplement (doi:10.3390/molecules27238634), 2022-12-06
Supplement: s1 [file s1]

# An Assessment of Mass Flows, Removal and Environmental Emissions of Bisphenols in a Sequencing Batch Reactor Wastewater Treatment Plant

Anja Vehar, Ana Kovačič, Nadja Hvala, David Škufca, Marjetka Levstek, Marjetka Stražar, Andreja Žgajnar Gotvajn, Ester Heath

## Content

|      |                                                              |    |
|------|--------------------------------------------------------------|----|
| S1.  | Specifications and physicochemical properties.....           | 2  |
| S2.  | Method development.....                                      | 5  |
| S3.  | Instrumental analysis.....                                   | 11 |
| S4.  | Method validation: solid phase of sludge.....                | 12 |
| S5.  | Method validation: sludge aqueous phase and wastewater ..... | 14 |
| S6.  | Concentrations of BPs .....                                  | 15 |
| S7.  | Data for calculating mass flows .....                        | 15 |
| S8.  | Mass flows.....                                              | 16 |
| S9.  | Removal of BPs in wastewater.....                            | 17 |
| S10. | References .....                                             | 18 |

## S1.Specifications and physicochemical properties

Based on the physicochemical properties and the structural formula of BPs, their distribution, transport, and bioavailability in different environments, such as water, soil, air, and sediments, can be predicted. There is a lack of physicochemical properties. Therefore, the collected data in Table S1 were obtained from the ChemSpider database, where the data were predicted with the EPI Suite™ software, developed jointly by the United States Environmental Protection Agency and Syracuse Research Corp. (SRC).

Table S1: Names, chemical structures, and physicochemical properties of the studied compounds

| Abbreviation and IUPAC name                | Chemical structure | CAS number | Solubility in water [mg L <sup>-1</sup> ] | log K <sub>ow</sub> | t <sub>1/2</sub> [day] |      |          | BCF [L kg <sup>-1</sup> ] | Ref.  |
|--------------------------------------------|--------------------|------------|-------------------------------------------|---------------------|------------------------|------|----------|---------------------------|-------|
|                                            |                    |            |                                           |                     | water                  | soil | sediment |                           |       |
| BPS<br>4,4'-sulfonyldiphenol               |                    | 80-09-1    | 3518                                      | 1,65                | 15                     | 30   | 135      | 3,697                     | [1]   |
| 22BPF<br>2-[(2-hydroxyphenyl)methyl]phenol |                    | 2467-02-9  | 408,1                                     | 3,06                | 15                     | 30   | 135      | 44,92                     | [2]   |
| 24BPF<br>2-[(4-hydroxyphenyl)methyl]phenol |                    | 2467-03-0  | 408,1                                     | 3,06                | 15                     | 30   | 135      | 44,92                     | [2]   |
| BPF<br>4-[(4-hydroxyphenyl)methyl]phenol   |                    | 620-92-8   | 542,8                                     | 3,06                | 15                     | 30   | 135      | 34,73                     | [2,3] |

|                                                                         |                                                                                     |            |       |      |      |     |        |       |       |
|-------------------------------------------------------------------------|-------------------------------------------------------------------------------------|------------|-------|------|------|-----|--------|-------|-------|
| BPE<br>4-[1-(4-hydroxyphenyl)ethyl]phenol                               | 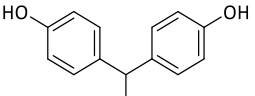   | 2081-08-5  | 265   | 3,19 | 15   | 30  | 135    | 57,01 | [2,3] |
| BPA<br>4-[2-(4-hydroxyphenyl)propan-2-yl]phenol                         |    | 80-05-7    | 172,7 | 3,64 | 37,5 | 75  | 337,5  | 71,85 | [2,3] |
| BPC2<br>4-[2,2-dichloro-1-(4-hydroxyphenyl)ethenyl]phenol               |    | 14868-03-2 | 37,93 | 3,75 | 37,5 | 75  | 337,5  | 153   | [2]   |
| BPB<br>4-[2-(4-hydroxyphenyl)butan-2-yl]phenol                          |    | 77-40-7    | 29,23 | 4,13 | 37,5 | 75  | 337,5  | 304,3 | [2]   |
| BPAF<br>4-[1,1,1,3,3,3-hexafluoro-2-(4-hydroxyphenyl)propan-2-yl]phenol |    | 1478-61-1  | 4,302 | 4,47 | 180  | 360 | 1620,8 | 556,3 | [2,3] |
| BPC<br>4-[2-(4-hydroxy-3-methylphenyl)propan-2-yl]-2-methylphenol       |   | 79-97-0    | 7,459 | 4,74 | 37,5 | 75  | 337,5  | 887,1 | [2,3] |
| BPAP<br>4-[1-(4-hydroxyphenyl)-1-phenylethyl]phenol                     |  | 1571-75-1  | 3,758 | 4,86 | 37,5 | 75  | 337,5  | 1101  | [2,3] |

|                                                                          |                                                                                    |            |         |      |      |     |       |       |       |
|--------------------------------------------------------------------------|------------------------------------------------------------------------------------|------------|---------|------|------|-----|-------|-------|-------|
| BPZ<br>4-[1-(4-hydroxyphenyl)cyclohexyl]phenol                           | 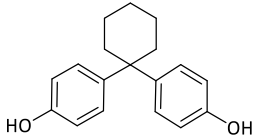  | 843-55-0   | 3,782   | 5,00 | 37,5 | 75  | 337,5 | 1422  | [2]   |
| BPBP<br>4-[(4-hydroxyphenyl)-diphenylmethyl]phenol                       |   | 1844-01-5  | 0,1473  | 6,08 | 37,5 | 75  | 337,5 | 9524  | [2]   |
| BPFL<br>4-[9-(4-hydroxyphenyl)fluoren-9-yl]phenol                        |   | 3236-71-3  | 0,01176 | 6,08 | 37,5 | 75  | 337,5 | 9524  | [2,3] |
| BPP<br>4-[2-[4-[2-(4-hydroxyphenyl)propan-2-yl]phenyl]propan-2-yl]phenol |   | 2167-51-3  | 0,113   | 6,25 | 60   | 120 | 541,7 | 13040 | [2,3] |
| BPPH<br>4-[2-(4-hydroxy-3-phenylphenyl)propan-2-yl]-2-phenylphenol       |  | 24038-68-4 | 0,01154 | 7,17 | 37,5 | 75  | 337,5 | 37650 | [2,4] |

## S2.Method development

Since the target compounds have  $\log K_{ow}$  values ranging from 1.65 (BPS) to 7.17 (BPPH), five different extraction solvents were tested. The highest average recovery of  $87 \pm 12\%$  was obtained using MeOH/MeCN (1:1, v/v), followed by MeOH/AcO (1:1, v/v) with an average recovery of  $86 \pm 7\%$ , 1 % FA in MeOH (v/v) with  $82 \pm 18\%$  and finally MeOH/H<sub>2</sub>O (7:3, v/v) with  $80 \pm 11\%$ . Ethyl acetate gave the lowest average recovery of  $18 \pm 8\%$ . Also, BPPH ( $\log K_{ow} = 7.17$ ) had the lowest recovery (Figure S1). This trend was observed during each optimization step using Oasis HLB Prime cartridges.

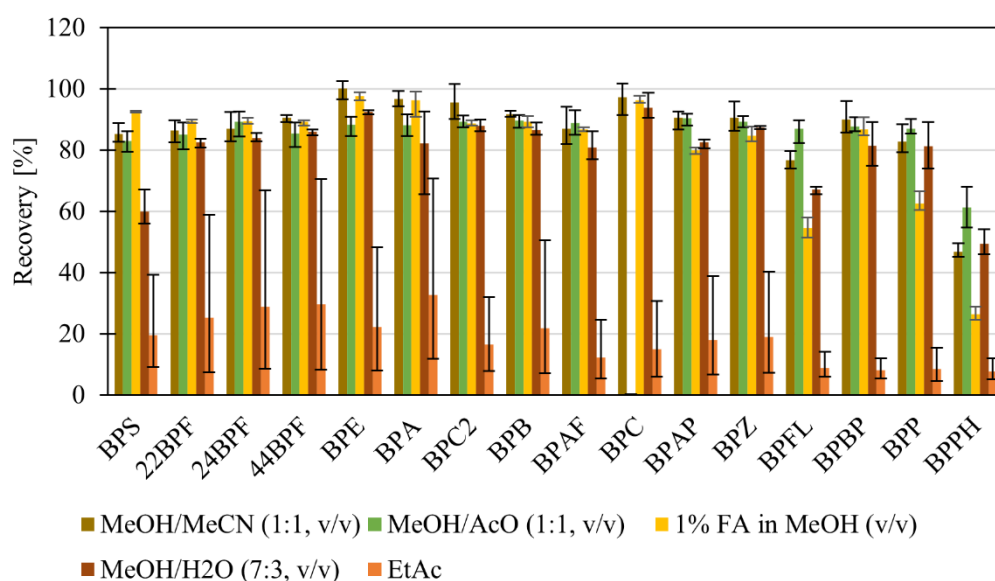

Figure S1: Recoveries obtained using five different extraction solvents for 16 BPs

Two different centrifugation regimes were tested in three repetitions (Figure S2). Average recoveries obtained during the first extraction step were  $80 \pm 9\%$  (12,000 RCF, 15 min) and  $74 \pm 13\%$  (9,000 RCF, 20 min), during the second extraction step an additional  $12 \pm 2\%$  (12,000 RCF, 15 min) and  $11 \pm 2\%$  (9,000 RCF, 20 min) was recovered, and a further  $2 \pm 1\%$  (12,000 RCF, 15 min and 9,000 RCF, 20 min) in the third step. Since the third step showed no significant contribution to the recoveries, only two repetitions of extraction were selected. Centrifugation regime 12,000 RCF for 15 min provided the highest recoveries; therefore, it was used in continuation.

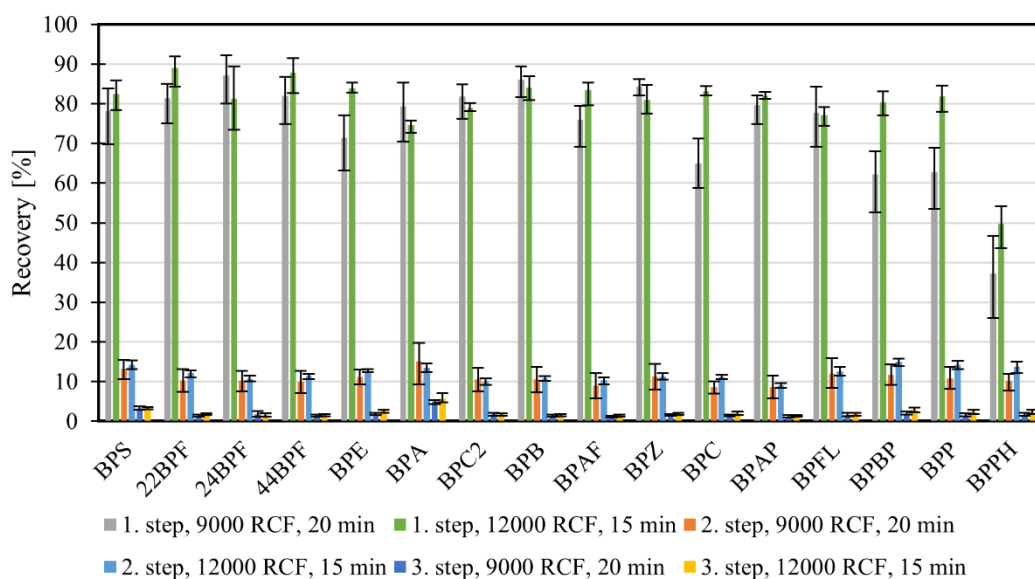

Figure S2: Recoveries obtained using different centrifugation parameters at each repetition of extraction for 16 BPs

Five solutions containing different amounts of MeOH were tested to reduce the matrix effect and avoid the loss of compounds (Figure S3). The solution of 10% MeOH in water provided the highest average recovery ( $90 \pm 10\%$ ) and was used in the following experiments. Solutions of 20%, 30% and 40% of MeOH gave similar recoveries from  $76 \pm 9\%$  to  $79 \pm 12\%$ , but overall, 10% lower than 10% MeOH in water. A 1:1 MeOH/water solution provided the lowest average recovery ( $68 \pm 12\%$ ).

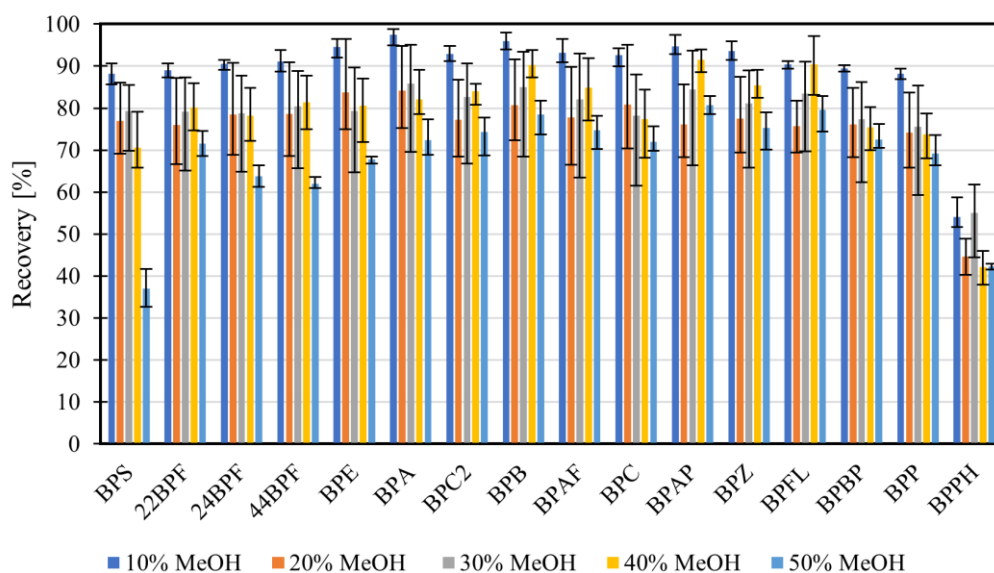

Figure S3: Recoveries for 16 BPs obtained using solutions containing different MeOH contents in water for sorbent washing

The addition of 50  $\mu\text{L}$  of concentrated HCl prior to loading the SPE cartridges was tested to improve the recovery (Figure S4). The result was a 5 % improvement in recovery.

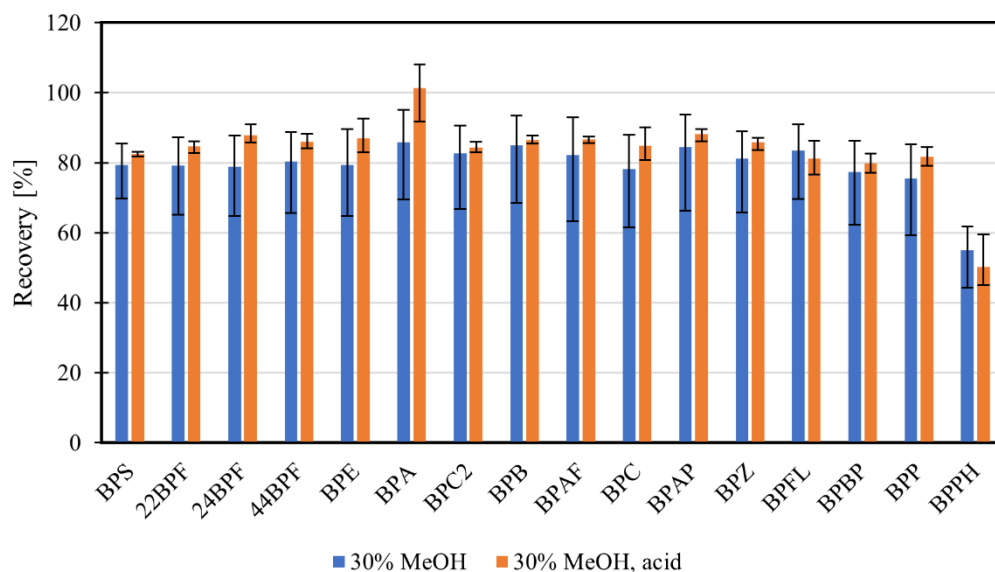

Figure S4: Recoveries for 16 BPs obtained when the sample was nonacidified and acidified before loading onto the cartridges

Five different solvents were used for elution (Figure S5). 5% FA in EtAc (v/v) provided the highest average recovery ( $96 \pm 8\%$ ), followed by 2 % FA in EtAc (v/v) ( $93 \pm 7\%$ ), the 5 %  $\text{NH}_3$  in EtAc (v/v) ( $89 \pm 6\%$ ) and 2 %  $\text{NH}_3$  in EtAc (v/v) ( $88 \pm 6\%$ ). The lowest average recovery ( $78 \pm 21\%$ ) was obtained using EtAc. The lowest recovery ( $4 \pm 1\%$ ) was obtained for BPS in EtAc.

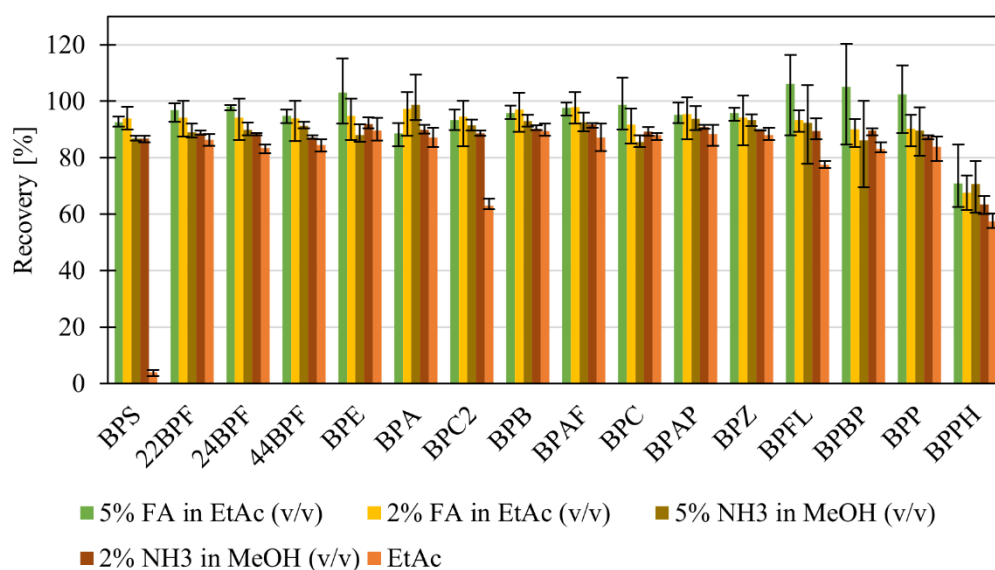

Figure S5: Recoveries for 16 BPs obtained using five different elution solvents

Since sludge is a complex matrix, the extracts obtained after sonification and centrifugation were cleaned with either CHROMAFIL® Xtra PTFE-45/25 filters or QuEChERS (Figure S6). Without a clean-up step, the highest average recovery was  $93 \pm 8\%$ , filtration of the extract provided an average recovery of  $86 \pm 9\%$ , while QuEChERS provided an average recovery of  $78 \pm 8\%$ . Therefore, the extracts were not cleaned before loading the SPE cartridges.

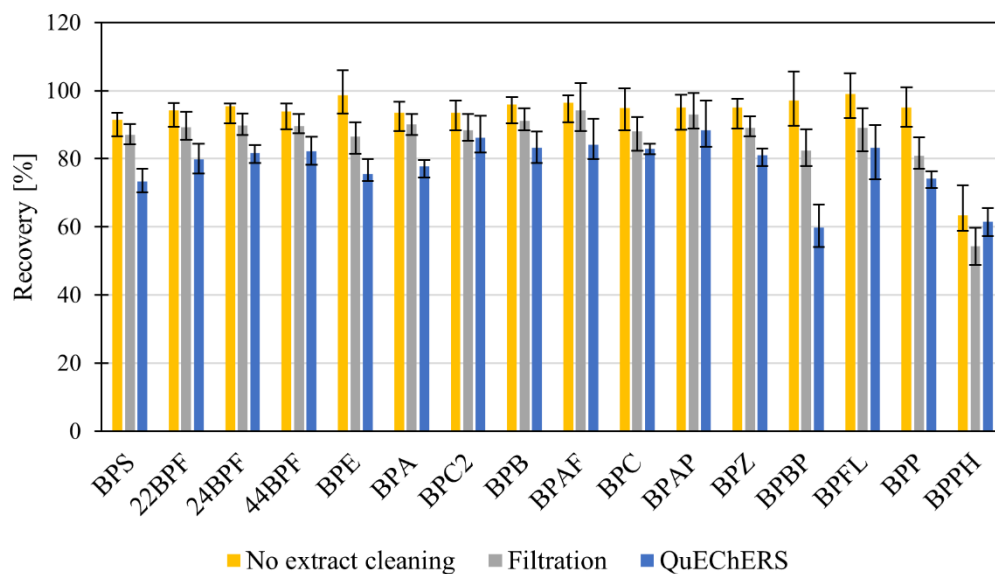

Figure S6: Recoveries obtained without an additional clean-up step, cleaned with filtration and QuEChERS



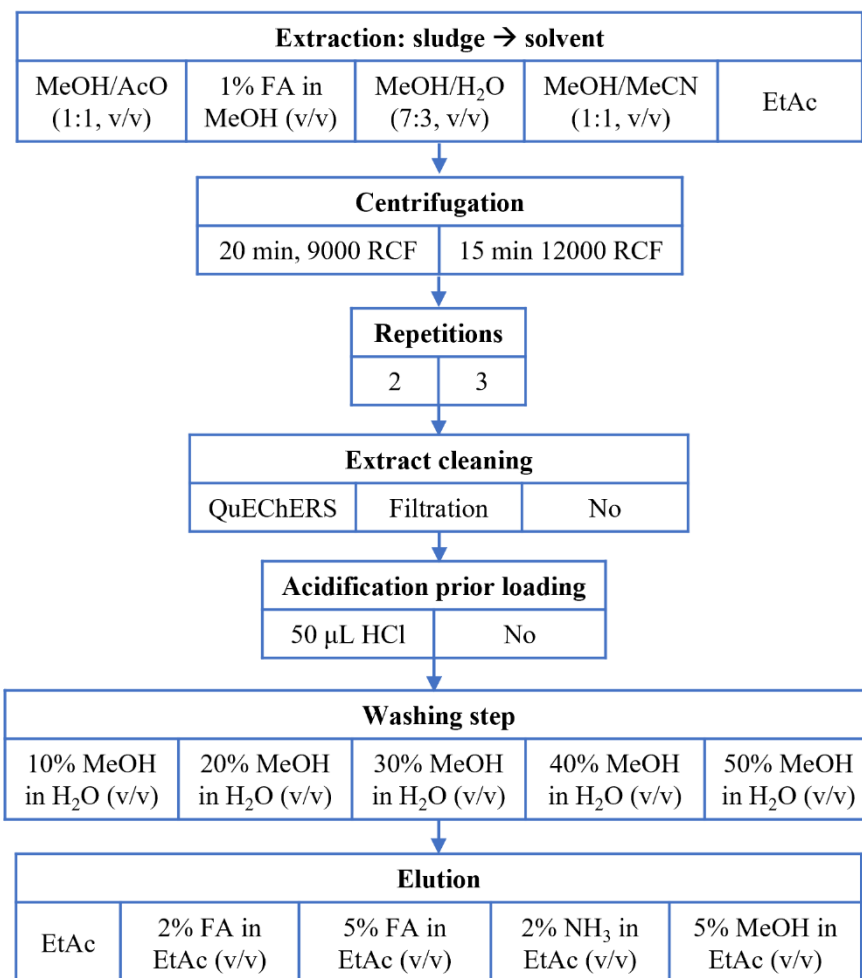

Figure S7: Schematic of test parameters using Oasis Prime HLB cartridges

Figure S8 shows the recoveries obtained using Affinimip® SPE Bisphenols cartridges by methods MIP1, its first variation MIP1a and second variation MIP1b and method MIP2, and recoveries obtained using Oasis Prime HLB cartridges by the method HLB. Methods MIP1 and MIP1a resulted in the lowest average recovery of  $37 \pm 13\%$  and  $31 \pm 15\%$ , respectively. Method MIP1b resulted in an average recovery of  $102 \pm 24\%$ . Method MIP2 gave an average recovery of  $89 \pm 15\%$ , comparable to procedure HLB, which provided an average recovery of  $93 \pm 8\%$ . Even though the average recovery using MIP1b was the highest, the standard deviation was also the highest. Since the HLB procedure provides better repeatability of results and is more cost-effective and less time-consuming, it was chosen as the most optimal method and validated.

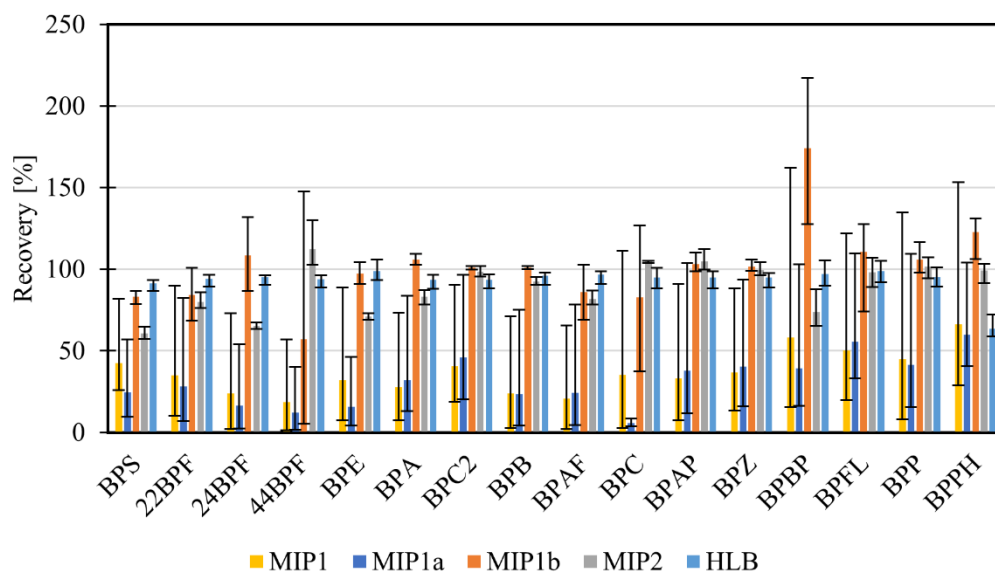

Figure S8: Comparison of the recoveries obtained using Oasis HLB Prime and Affinimip® SPE Bisphenols cartridges following two different procedures and their variations

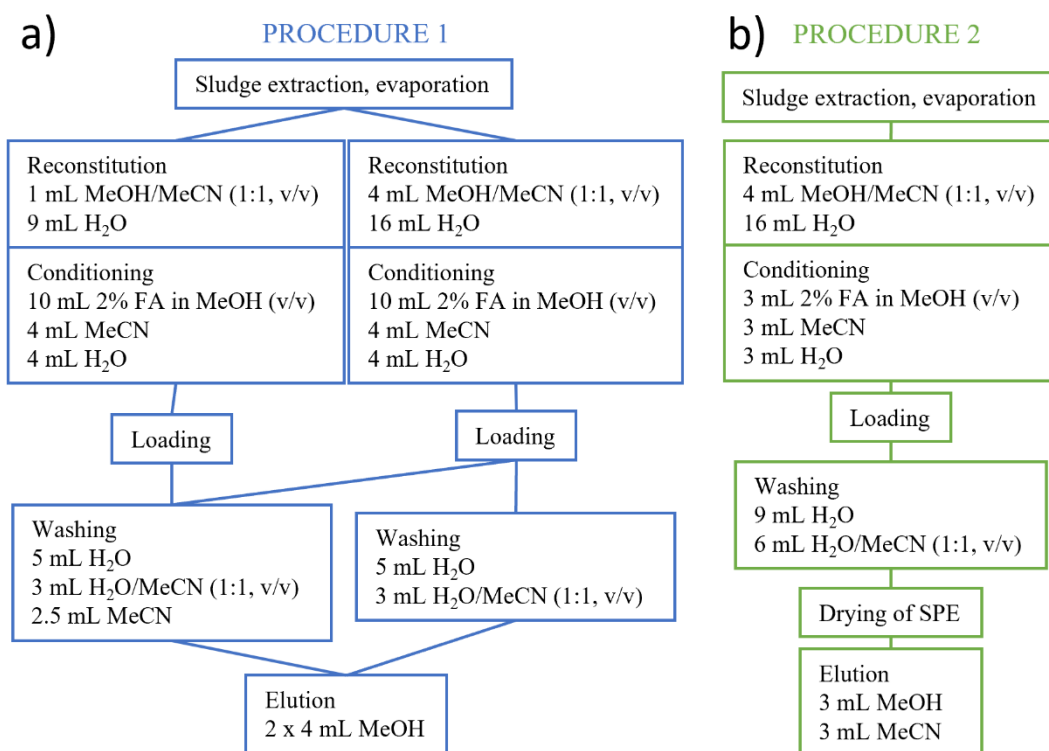

Figure S9: Schematic of Affinimip® SPE Bisphenol extraction procedures

### S3. Instrumental analysis

Table S2: A list of bisphenols and internal standards, monitored ions [m/z] (quantifier ion in bold and two qualifier ions) of derivatized compounds, and retention times (RT)

| Compound                           | Monitored ion 1<br>[m/z] | Monitored ion 2<br>[m/z] | Monitored ion 3<br>[m/z] | RT<br>[min] |
|------------------------------------|--------------------------|--------------------------|--------------------------|-------------|
| 22BPF                              | <b>344</b>               | 329                      | 241                      | 8.31        |
| BPAF                               | 480                      | 465                      | <b>411</b>               | 8.80        |
| 24BPF                              | <b>344</b>               | 329                      | 241                      | 9.30        |
| 44BPF                              | <b>344</b>               | 329                      | 179                      | 10.28       |
| BPE                                | 358                      | <b>343</b>               | 193                      | 10.56       |
| BPA                                | 372                      | <b>357</b>               | 339                      | 10.87       |
| BPC                                | 400                      | <b>385</b>               | 221                      | 11.50       |
| BPB                                | 386                      | 371                      | <b>357</b>               | 11.60       |
| BPC2                               | <b>424</b>               | 374                      | 259                      | 13.03       |
| BPZ                                | <b>412</b>               | 397                      | 369                      | 14.13       |
| BPS                                | <b>394</b>               | 379                      | 229                      | 14.80       |
| BPAP                               | 434                      | <b>419</b>               | 269                      | 15.12       |
| BPP                                | 490                      | <b>475</b>               | 387                      | 19.37       |
| BPBP                               | 496                      | <b>419</b>               | 331                      | 20.13       |
| BPPH                               | 524                      | <b>509</b>               | 283                      | 20.3        |
| BPFL                               | <b>494</b>               | 329                      | 239                      | 21.75       |
| <sup>13</sup> C <sub>12</sub> -BPF | <b>356</b>               | 341                      | 185                      | 10.28       |
| BPA-d <sub>16</sub>                | 386                      | <b>368</b>               | 217                      | 10.79       |
| <sup>13</sup> C <sub>12</sub> -BPB | 398                      | 383                      | <b>369</b>               | 11.60       |
| <sup>13</sup> C <sub>12</sub> -BPS | <b>406</b>               | 391                      | 379                      | 14.80       |

#### S4. Method validation: solid phase of sludge

Since the blank sludge without compounds was not accessible, the calibration curve was performed in solvent MeOH. Method repeatability, instrumental repeatability, accuracy, and recovery were performed using grab sampling of activated sludge and assessed at the low concentrations: 80 ng g<sup>-1</sup> (BPA) and 25 ng g<sup>-1</sup> (15 BPs) and at the high concentrations: 250 ng g<sup>-1</sup> (BPA) and 80 ng g<sup>-1</sup> (15 BPs). Instrumental repeatability was determined as the standard deviation of three consecutive injections of the same sample (n = 3), whereas method repeatability was determined as the standard deviation of three replicate samples. Method accuracy [%] was expressed as  $[(\text{experimental value} - \text{sample value}) - \text{spiked value}) / \text{spiked value}]$  (n = 3). The LOD and LOQ were calculated as 3-times and 10-times the standard deviation of the baseline of the procedural blank divided by the slope of the calibration curve (n = 15). SPE recovery was calculated as the ratio between the peak area of spiked compound added prior to extraction (n = 3) and the peak area of the same amount of compound added post-extraction (n = 3). The calibration curve consisted of eight points ranging from 30 ng g<sup>-1</sup> to 300 ng g<sup>-1</sup> for BPA and from 1 to 100 ng g<sup>-1</sup> for the rest 15 BPs using the ratio between the peak area of the compound to surrogate standard versus the concentration of the compound. The linearity of the calibration curve was assessed by calculating the coefficient of determination (R<sup>2</sup>). Sensitivity was expressed as the slope (k) of the calibration curves. Since we used a grab sample of activated sludge, the matrix effect was assessed using internal standards at the low concentrations: 30 ng g<sup>-1</sup> (BPA-d<sub>16</sub>) and 2 ng g<sup>-1</sup> (<sup>13</sup>C<sub>12</sub>-BPS, <sup>13</sup>C<sub>12</sub>-BPF, <sup>13</sup>C<sub>12</sub>-BPB) and high concentrations: 100 ng g<sup>-1</sup> (BPA-d<sub>16</sub>) and 10 ng g<sup>-1</sup> (<sup>13</sup>C<sub>12</sub>-BPS, <sup>13</sup>C<sub>12</sub>-BPF, <sup>13</sup>C<sub>12</sub>-BPB). Matrix effect was expressed as  $[(1 - \text{the area of IS added after elution} / \text{area of IS in the solvent}) \times 100\%]$  (n = 3).

Table S3: Validation parameters (method repeatability, instrumental repeatability, accuracy, k and R<sup>2</sup> values, SPE recovery, LOD and LOQ) of an analytical method for determination of 16 BPs in the solid phase of sludge

| Compound | Method repeatability<br>[n = 3, RSD] |    | Instrumental repeatability<br>[n = 3, RSD] |    | Accuracy<br>[n = 3, %] |    | Calibration [n = 3]     |                    | Recovery<br>[n = 3, %] |    | LOD<br>[ng g <sup>-1</sup> ] | LOQ<br>[ng g <sup>-1</sup> ] |
|----------|--------------------------------------|----|--------------------------------------------|----|------------------------|----|-------------------------|--------------------|------------------------|----|------------------------------|------------------------------|
|          | L*                                   | H* | L*                                         | H* | L*                     | H* | k [g ng <sup>-1</sup> ] | R <sup>2</sup> [/] | L*                     | H* |                              |                              |
| BPS      | 2                                    | 2  | 1                                          | 1  | 3                      | 5  | 0.0448                  | 0.9996             | 93                     | 88 | 0.42                         | 1.40                         |
| 22BPF    | 13                                   | 7  | 4                                          | 5  | 43                     | 30 | 0.0681                  | 0.9966             | 85                     | 93 | 0.07                         | 0.24                         |

|       |    |    |    |    |    |    |        |        |     |     |      |       |
|-------|----|----|----|----|----|----|--------|--------|-----|-----|------|-------|
| 24BPF | 9  | 12 | 11 | 4  | 39 | 27 | 0.0487 | 0.9981 | 78  | 89  | 0.11 | 0.36  |
| 44BPF | 4  | 2  | 1  | 1  | 19 | 2  | 0.0505 | 0.9996 | 92  | 84  | 0.17 | 0.57  |
| BPE   | 6  | 4  | 7  | 5  | 3  | 3  | 0.1077 | 0.9996 | 94  | 95  | 0.06 | 0.21  |
| BPA   | 5  | 7  | 1  | 3  | 46 | 18 | 0.0210 | 0.9971 | 107 | 81  | 8.43 | 28.10 |
| BPC2  | 7  | 5  | 1  | 1  | 1  | 11 | 0.0174 | 0.9990 | 83  | 94  | 0.03 | 0.09  |
| BPB   | 5  | 5  | 1  | 1  | 29 | 21 | 0.0329 | 0.9997 | 89  | 98  | 0.05 | 0.18  |
| BPAF  | 9  | 4  | 11 | 1  | 13 | 8  | 0.0421 | 0.9986 | 82  | 93  | 0.21 | 0.69  |
| BPC   | 28 | 61 | 12 | 18 | 62 | 57 | 0.0362 | 0.9986 | 77  | 89  | 0.21 | 0.69  |
| BPAP  | 7  | 7  | 1  | 1  | 30 | 29 | 0.0227 | 0.9996 | 89  | 131 | 0.04 | 0.13  |
| BPZ   | 9  | 14 | 1  | 3  | 4  | 20 | 0.0067 | 0.9986 | 91  | 116 | 0.01 | 0.05  |
| BPBP  | 8  | 13 | 5  | 7  | 38 | 40 | 0.0120 | 0.9991 | 62  | 90  | 0.01 | 0.05  |
| BPFL  | 8  | 33 | 3  | 38 | 74 | 73 | 0.0091 | 0.9967 | 81  | 99  | 0.02 | 0.05  |
| BPP   | 7  | 13 | 2  | 9  | 40 | 41 | 0.0148 | 0.9994 | 64  | 94  | 0.02 | 0.07  |
| BPPH  | 37 | 26 | 3  | 14 | 33 | 59 | 0.0047 | 0.9995 | 72  | 119 | 0.01 | 0.03  |

\* L and H values refer to L = lower concentration ( $c(\text{BPA}) = 80 \text{ ng g}^{-1}$  and  $c(15 \text{ BPs}) = 25 \text{ ng g}^{-1}$ ) and H = higher concentration ( $c(\text{BPA}) = 250 \text{ ng g}^{-1}$  and  $c(15 \text{ BPs}) = 80 \text{ ng g}^{-1}$ )

Table S4: Matrix effect

| Internal standard               | Matrix effect [%] |      |
|---------------------------------|-------------------|------|
|                                 | L*                | H*   |
| $^{13}\text{C}_{12}\text{-BPS}$ | 58                | -59  |
| $^{13}\text{C}_{12}\text{-BPF}$ | -5                | -6   |
| $^{13}\text{C}_{12}\text{-BPB}$ | 17                | 14   |
| BPA-d <sub>16</sub>             | -135              | -119 |

\* L and H values refer to L = lower concentration ( $c(\text{BPA}) = 80 \text{ ng g}^{-1}$  and  $c(15 \text{ BPs}) = 25 \text{ ng g}^{-1}$ ) and H = higher concentration ( $c(\text{BPA}) = 250 \text{ ng g}^{-1}$  and  $c(15 \text{ BPs}) = 80 \text{ ng g}^{-1}$ )

## S5. Method validation: sludge aqueous phase and wastewater

Validation of the analytical method to determine 16 BPs in the aqueous phase of sludge and WW was performed using artificial WW effluent. The calibration curve consisted of eight calibrants ranging from 10 ng g<sup>-1</sup> to 1,100 ng g<sup>-1</sup> for BPA and 2 ng g<sup>-1</sup> to 500 ng g<sup>-1</sup> for the other 15 BPs (Table S5).

Table S5: Validation parameters (k and R<sup>2</sup> values, recovery, LOD, LOQ) of an analytical method for the determination of 16 BPs in the aqueous phase of sludge and WW

| Compound | k [L ng <sup>-1</sup> , n = 3] | R <sup>2</sup> [/ , n = 3] | Recovery*<br>[n = 3, %] |       | LOD*<br>[ng L <sup>-1</sup> , n = 6] | LOQ*<br>[ng L <sup>-1</sup> , n = 6] |
|----------|--------------------------------|----------------------------|-------------------------|-------|--------------------------------------|--------------------------------------|
|          |                                |                            | L**                     | H**   |                                      |                                      |
| BPS      | 0.0112                         | 1.0000                     | 101.3                   | 91.8  | 0.51                                 | 1.70                                 |
| 22BPF    | 0.0155                         | 0.9996                     | 98.8                    | 86.6  | 0.16                                 | 0.53                                 |
| 24BPF    | 0.0114                         | 0.9999                     | 98.5                    | 86.5  | 0.62                                 | 2.06                                 |
| 44BPF    | 0.0124                         | 0.9999                     | 96.2                    | 88.2  | 0.24                                 | 0.80                                 |
| BPE      | 0.0091                         | 0.9988                     | 94.8                    | 86.5  | 0.13                                 | 0.45                                 |
| BPA      | 0.0097                         | 0.9989                     | 97.4                    | 93.2  | 5.22                                 | 17.39                                |
| BPC2     | 0.0061                         | 0.9996                     | 91.2                    | 90.9  | 0.46                                 | 1.52                                 |
| BPB      | 0.0105                         | 0.9999                     | 97.5                    | 89.6  | 0.31                                 | 1.05                                 |
| BPAF     | 0.0104                         | 0.9997                     | 41.4                    | 106.4 | 1.26                                 | 4.19                                 |
| BPC      | 0.004                          | 0.9799                     | 98.6                    | 81.5  | 0.10                                 | 0.34                                 |
| BPAP     | 0.0078                         | 0.9965                     | 114.8                   | 84.1  | 0.25                                 | 0.83                                 |
| BPZ      | 0.0023                         | 0.9999                     | 101.1                   | 91.1  | 0.28                                 | 0.93                                 |
| BPBP     | 0.0037                         | 0.9980                     | 99.3                    | 86.7  | 0.36                                 | 1.18                                 |
| BPFL     | 0.0035                         | 0.9994                     | 96.7                    | 89.1  | 0.25                                 | 0.84                                 |
| BPP      | 0.0038                         | 0.9951                     | 100.1                   | 90.7  | 0.44                                 | 1.47                                 |
| BPPH     | 0.0006                         | 0.9824                     | 89.3                    | 70.3  | 0.74                                 | 2.48                                 |

\*Recovery, LOD and LOQ have been determined in Kovačič et al., 2019 [2]

\*\* L and H values refer to L = lower concentration (c (BPA) = 25 ng L<sup>-1</sup>, c (15BPs) = 5 ng L<sup>-1</sup>), H = higher concentration (c (BPA) = 500 ng L<sup>-1</sup>, c (15BPs) = 130 ng L<sup>-1</sup>)

## S6. Concentrations of BPs

Table S6: Concentrations of BPs in WW and sludge at different points and in different phases

| Matrix              | Unit               | BPS | 22BPF | 24BPF | 44BPF | BPE  | BPA  | BPC2 | BPB  | BPAF | BPC  | BPAP | BPZ  | BPBP | BPFL | BPP  | BPPH | Total |
|---------------------|--------------------|-----|-------|-------|-------|------|------|------|------|------|------|------|------|------|------|------|------|-------|
| WWTP <sub>inf</sub> | ng L <sup>-1</sup> | 434 | 2     | 12    | 23    | 37   | 393  | 47   | <LOD | 19   | <LOD | 6    | <LOQ | <LOQ | <LOD | 2    | <LOD | 976   |
| PSE <sub>inf</sub>  | ng L <sup>-1</sup> | 577 | 19    | 67    | 37    | 32   | 418  | <LOQ | <LOQ | <LOQ | <LOD | 6    | <LOQ | <LOQ | <LOD | 3    | <LOD | 1158  |
| PSE <sub>eff</sub>  | ng L <sup>-1</sup> | 591 | 19    | 62    | 42    | 51   | 483  | <LOQ | <LOQ | 8    | <LOD | 6    | <LOQ | 23   | <LOD | 3    | <LOD | 1289  |
| WWTP <sub>eff</sub> | ng L <sup>-1</sup> | 20  | 3     | <LOD  | <LOD  | <LOD | 79   | <LOD | <LOD | <LOQ | <LOD | 2    | <LOQ | 3    | <LOD | <LOD | <LOD | 107   |
| PS – AP             | ng L <sup>-1</sup> | 693 | 31    | 149   | 158   | 6    | 791  | 12   | 25   | 15   | 15   | 28   | 25   | 5    | <LOD | 3    | <LOD | 1956  |
| PS – SP             | ng g <sup>-1</sup> | 48  | 39    | 2     | 7     | 2    | 221  | 1    | 6    | 6    | 11   | 1    | 5    | <LOQ | <LOD | 1    | <LOQ | 350   |
| SS – AP             | ng L <sup>-1</sup> | 46  | 8     | 3     | 7     | <LOD | 273  | <LOD | 4    | 12   | <LOD | 63   | 9    | 11   | <LOD | 2    | <LOD | 438   |
| SS – SP             | ng g <sup>-1</sup> | 6   | 6     | 2     | 13    | 4    | 118  | 4    | 6    | 2    | 2    | 3    | 2    | 1    | <LOD | <LOQ | <LOQ | 168   |
| AS – AP             | ng L <sup>-1</sup> | 812 | 69    | 598   | 636   | 10   | 3248 | 5    | 2    | <LOD | <LOD | 7    | 23   | 12   | <LOD | 4    | 2    | 5430  |
| AS – SP             | ng g <sup>-1</sup> | 45  | 13    | 82    | 83    | 4    | 946  | <LOQ | <LOQ | 2    | 2    | <LOQ | 2    | 9    | <LOD | <LOQ | <LOQ | 1188  |

## S7. Data for calculating mass flows

Table S7: Sampling time, volumetric flows, total suspended solids, and other basic parameters in wastewater and sludge flows

| Sampling point      | Start of the sampling | End of the sampling | Volumetric flow [m <sup>3</sup> d <sup>-1</sup> ] | pH [°] | Conductivity [µS cm <sup>-1</sup> ] | TN [mg L <sup>-1</sup> ] | TP [mg L <sup>-1</sup> ] | COD [mg L <sup>-1</sup> ] | TSS [g L <sup>-1</sup> ] | TSS% [%] |
|---------------------|-----------------------|---------------------|---------------------------------------------------|--------|-------------------------------------|--------------------------|--------------------------|---------------------------|--------------------------|----------|
| WWTP <sub>inf</sub> | 16. 3. 2021, 8:00     | 17. 3. 2021, 8:00   | 18,781                                            | 8.1    | 1304                                | 63                       | 12.3                     | 936                       | 0.474                    | /        |
| PSE <sub>inf</sub>  | 16. 3. 2021, 8:00     | 17. 3. 2021, 8:00   | 18,781                                            | 8.1    | 1304                                | 63                       | 12.3                     | 936                       | 0.474                    | /        |
| PSE <sub>eff</sub>  | 16. 3. 2021, 8:00     | 17. 3. 2021, 8:00   | 18,781                                            | 7.9    | 1240                                | 51.2                     | 6.4                      | 454                       | 0.150                    | /        |
| WWTP <sub>eff</sub> | 17. 3. 2021, 8:00     | 18. 3. 2021, 8:00   | 18,781                                            | 7.5    | 1059                                | 7.5                      | 0.9                      | 31.2                      | 0.0091                   | /        |
| PS                  | 16. 3. 2021, 8:00     | 16. 3. 2021, 14:00  | 160                                               | 6.2    | /                                   | 1305                     | 478                      | 48533                     | 46.0                     | 4.6      |
| SS                  | 16. 3. 2021, 8:00     | 16. 3. 2021, 14:00  | 29                                                | 6.8    | /                                   | 2275                     | 1365                     | 55467                     | 46.8                     | 4.7      |
| AS                  | 16. 3. 2021, 14:00    | 16. 3. 2021, 14:00  | 177                                               | 7.8    | /                                   | 1975                     | 708                      | 23300                     | 24.3                     | 2.4      |

\*TN – total nitrogen, TP – total phosphorus, COD – chemical oxygen demand

### S8. Mass flows

Table S8: Total BPs mass flows and their distribution in different types of sludge in aqueous and solid phase

| <b>Sludge</b>  | <b><math>\dot{M}</math> [g day<sup>-1</sup>]</b> | <b>Distribution [%]</b> |
|----------------|--------------------------------------------------|-------------------------|
| <b>PS – AP</b> | 0.29                                             | 11                      |
| <b>PS – SP</b> | 2.41                                             | 89                      |
| <b>SS – AP</b> | 0.01                                             | 5                       |
| <b>SS – SP</b> | 0.21                                             | 95                      |
| <b>AS – AP</b> | 0.93                                             | 15                      |
| <b>AS – SP</b> | 5.10                                             | 85                      |



## S9. Removal of BPs in wastewater

Table S9: Comparison of mean concentrations of BPs in influent, effluent, sludge and their removal with literature

| Treatment                                   | Matrix / Removal | Year | Unit               | BPA     | BPAF | BPE   | BPF   | BPS   | BPB  | BPZ  | BPAP | BPP  | BPBP | BPC   | BPG  | BPPH | BPTMC | 22BPF | 24BPF | BPC2 | Total   | Ref        |
|---------------------------------------------|------------------|------|--------------------|---------|------|-------|-------|-------|------|------|------|------|------|-------|------|------|-------|-------|-------|------|---------|------------|
| Primary & secondary treatment, disinfection | Influent         | 2016 | ng L <sup>-1</sup> | 1920.71 | 1.50 | 7.13  | 50.57 | 85.64 | /    | /    | /    | /    | /    | /     | /    | /    | /     | /     | /     | /    | 2065.55 | [5]        |
|                                             | Effluent         |      | ng L <sup>-1</sup> | 223.71  | 1.45 | 8.70  | 6.69  | 1.34  | /    | /    | /    | /    | /    | /     | /    | /    | /     | /     | /     | /    | 241.90  |            |
|                                             | SS               |      | ng g <sup>-1</sup> | 445.14  | 7.14 | 7.99  | 70.40 | 3.40  | /    | /    | /    | /    | /    | /     | /    | /    | /     | /     | /     | /    | 534.07  |            |
|                                             | Removal          |      | %                  | 78.3    | -153 | -82.5 | 93.8  | 98.9  | /    | /    | /    | /    | /    | /     | /    | /    | /     | /     | /     | /    | 88.3    |            |
| Primary & secondary treatment               | Influent         | 2012 | ng L <sup>-1</sup> | 60.5    | 1.1  | /     | 10.4  | 14.7  | 2.5  | 0.6  | 0.3  | 7.8  | /    | /     | /    | /    | /     | /     | /     | /    | 98.0    | [6]        |
|                                             | Effluent         |      | ng L <sup>-1</sup> | 5.2     | <LOD | /     | 0.6   | 2.4   | 0.6  | <LOD | <LOD | 0.8  | /    | /     | /    | /    | /     | /     | /     | /    | 9.6     |            |
|                                             | PS & SS          |      | ng g <sup>-1</sup> | 5.6     | <LOD | /     | 8.2   | 185.7 | <LOD | <LOD | <LOD | <LOD | /    | /     | /    | /    | /     | /     | /     | /    | 199.0   |            |
|                                             | Removal          |      | %                  | 81.6    | 100  | /     | 96.3  | 83.1  | 78.7 | 100  | 100  | 97.6 | /    | /     | /    | /    | /     | /     | /     | /    | 90.2    |            |
| Primary & secondary treatment, disinfection | Influent         | 2015 | ng L <sup>-1</sup> | 4329    | 11.7 | 2.09  | 71.8  | 119.6 | /    | 0.71 | /    | /    | 0.14 | 0.32  | 0.62 | 0.25 | 0.78  | /     | /     | /    | 4537    | [1]        |
|                                             | Effluent         |      | ng L <sup>-1</sup> | 548     | 5.0  | 2.04  | 8.67  | 4.74  | /    | /    | /    | /    | 0.11 | 0.22  | /    | 0.16 | 0.25  | /     | /     | /    | 569     |            |
|                                             | Excess sludge    |      | ng g <sup>-1</sup> | 550     | 5.32 | 1.24  | 316   | 1.07  | /    | /    | /    | /    | /    | 0.28  | 0.43 | 2.35 | 1.43  | /     | /     | /    | 878     |            |
|                                             | Removal          |      | %                  | 81      | 65   | 2     | 76    | 91    | /    | /    | /    | /    | 22   | 31    | /    | 36   | 68    | /     | /     | /    | 87      |            |
| Primary & secondary treatment               | Influent         | 2015 | ng L <sup>-1</sup> | 71.7    | /    | /     | 90.2  | 29.4  | /    | /    | /    | /    | /    | /     | /    | /    | /     | /     | /     | /    | 219.5   | [7]        |
|                                             | Effluent         |      | ng L <sup>-1</sup> | 39.1    | /    | /     | 65.6  | 25.5  | /    | /    | /    | /    | /    | /     | /    | /    | /     | /     | /     | /    | 156     |            |
|                                             | PS & SS          |      | ng g <sup>-1</sup> | 599.5   | /    | /     | 140   | 11.8  | /    | /    | /    | /    | /    | /     | /    | /    | /     | /     | /     | /    | 724.5   |            |
|                                             | Removal          |      | %                  | 46      | /    | /     | 27    | 13    | /    | /    | /    | /    | /    | /     | /    | /    | /     | /     | /     | /    | 29      |            |
| Primary & secondary treatment               | Influent         | 2015 | ng L <sup>-1</sup> | 4121    | 12.6 | 3.03  | 73.3  | 204   | /    | 0.86 | /    | /    | 0.21 | 0.374 | /    | <LOD | 1.31  | /     | /     | /    | 4416    | [8]        |
|                                             | Effluent         |      | ng L <sup>-1</sup> | 267.8   | 3.35 | <LOD  | 2.44  | 0.51  | /    | 0.33 | /    | /    | <LOD | <LOD  | /    | <LOD | 0.68  | /     | /     | /    | 275     |            |
|                                             | PS & SS          |      | ng g <sup>-1</sup> | 275     | 10.2 | <LOD  | 229   | 1.50  | /    | /    | /    | /    | <LOD | /     | /    | /    | 3.11  | /     | /     | /    | 520     |            |
|                                             | Removal          |      | %                  | 94      | 73   | /     | 97    | 99    | /    | 62   | /    | /    | /    | /     | /    | /    | 48    | /     | /     | /    | 94      |            |
| Primary & secondary treatment               | Influent         | 2022 | ng L <sup>-1</sup> | 576     | 10   | 52    | 46    | 616   | 4    | 3    | 7    | 3    | 23   | 5     | /    | <LOD | /     | 35    | 64    | 1    | 1443    | this study |
|                                             | Effluent         |      | ng L <sup>-1</sup> | 79      | <LOQ | <LOD  | <LOD  | 20    | <LOD | <LOQ | 2    | <LOD | 3    | <LOD  | /    | <LOD | /     | 3     | <LOD  | <LOD | 107     |            |
|                                             | PS & SS          |      | ng g <sup>-1</sup> | 205     | 5    | 2     | 8     | 41    | 6    | 5    | 1    | <LOD | <LOD | 10    | /    | <LOD | /     | 34    | 2     | 1    | 322     |            |
|                                             | PS & SS          |      | ng L <sup>-1</sup> | 712     | 15   | 5     | 135   | 594   | 22   | 23   | 33   | <LOD | 6    | 13    | /    | <LOD | /     | 27    | 127   | 10   | 1723    |            |
|                                             | Removal          |      | %                  | 86      | 76   | 98    | 98    | 97    | 72   | 68   | 70   | 71   | 87   | 82    | /    | /    | /     | 91    | 98    | 33   | 92      |            |

\*If the authors did not provide the mean values of concentrations or removals, they were recalculated based on the reported data.

\*\*Removal includes both biodegradation and adsorption to sludge.

\*\*\* /: data is not available.

\*\*\*\* Concentrations of this study were recalculated based on the used methodology

## S10.References

1. Huang, Z.; Zhao, J.-L.; Yang, Y.-Y.; Jia, Y.-W.; Zhang, Q.-Q.; Chen, C.-E.; Liu, Y.-S.; Yang, B.; Xie, L.; Ying, G.-G. Occurrence, Mass Loads and Risks of Bisphenol Analogues in the Pearl River Delta Region, South China: Urban Rainfall Runoff as a Potential Source for Receiving Rivers. *Environ. Pollut.* **2020**, *263*, 114361, doi:10.1016/j.envpol.2020.114361.
2. Kovačič, A.; Česen, M.; Laimou-Geraniou, M.; Lambropoulou, D.; Kosjek, T.; Heath, D.; Heath, E. Stability, Biological Treatment and UV Photolysis of 18 Bisphenols under Laboratory Conditions. *Environ. Res.* **2019**, *179*, 108738, doi:10.1016/j.envres.2019.108738.
3. Hu, Y.; Zhu, Q.; Yan, X.; Liao, C.; Jiang, G. Occurrence, Fate and Risk Assessment of BPA and Its Substituents in Wastewater Treatment Plant: A Review. *Environ. Res.* **2019**, *178*, 108732, doi:10.1016/j.envres.2019.108732.
4. Niu, Y.; Wang, B.; Zhao, Y.; Zhang, J.; Shao, B. Highly Sensitive and High-Throughput Method for the Analysis of Bisphenol Analogues and Their Halogenated Derivatives in Breast Milk. *J. Agric. Food Chem.* **2017**, *65*, 10452–10463, doi:10.1021/acs.jafc.7b04394.
5. Sun, Q.; Wang, Y.; Li, Y.; Ashfaq, M.; Dai, L.; Xie, X.; Yu, C.-P. Fate and Mass Balance of Bisphenol Analogues in Wastewater Treatment Plants in Xiamen City, China. *Environ. Pollut.* **2017**, *225*, 542–549, doi:10.1016/j.envpol.2017.03.018.
6. Karthikraj, R.; Kannan, K. Mass Loading and Removal of Benzotriazoles, Benzothiazoles, Benzophenones, and Bisphenols in Indian Sewage Treatment Plants. *Chemosphere* **2017**, *181*, 216–223, doi:10.1016/j.chemosphere.2017.04.075.
7. Xue, J.; Kannan, K. Mass Flows and Removal of Eight Bisphenol Analogs, Bisphenol A Diglycidyl Ether and Its Derivatives in Two Wastewater Treatment Plants in New York State, USA. *Sci. Total Environ.* **2019**, *648*, 442–449, doi:10.1016/j.scitotenv.2018.08.047.
8. Huang, Z.; Zhao, J.-L.; Zhang, C.-Y.; Rao, W.-L.; Liang, G.-H.; Zhang, H.; Liu, Y.-H.; Guan, Y.-F.; Zhang, H.-Y.; Ying, G.-G. Profile and Removal of Bisphenol Analogues in Hospital Wastewater, Landfill Leachate, and Municipal Wastewater in South China. *Sci. Total Environ.* **2021**, *790*, 148269, doi:10.1016/j.scitotenv.2021.148269.
